# Supplementary material for: Single-cell profiling reveals the dynamics of cytomegalovirus-specific T cells in haploidentical hematopoietic stem cell transplantation
Source: PubMed Central journal article supplement — Haematologica. 2021 Jul 8;106(10):2768–73. doi: 10.3324/haematol.2020.276352 (PMC8485680; doi:10.3324/haematol.2020.276352), 2021-07-08
Supplement: 2020_276352_VAN_BEEK_SUPPL.pdf [file 2020_276352_VAN_BEEK_SUPPL.pdf]

**Single-cell profiling reveals the dynamics of cytomegalovirus-specific T cells in haploidentical hematopoietic stem cell transplantation**

Jasper J. P. van Beek,<sup>1\*</sup> Alessandra Roberto,<sup>1\*</sup> Simone Puccio,<sup>1</sup> Federica De Paoli,<sup>1</sup> Giulia Graziano,<sup>2</sup> Elisa Salviato,<sup>2</sup> Giorgia Alvisi,<sup>1</sup> Veronica Zanon,<sup>1</sup> Alice Scarpa,<sup>1</sup> Elisa Zaghi,<sup>1</sup> Michela Calvi,<sup>1</sup> Clara Di Vito,<sup>3</sup> Rossana Mineri,<sup>1</sup> Barbara Sarina,<sup>1</sup> Chiara De Philippis,<sup>1</sup> Armando Santoro,<sup>1,4</sup> Jacopo Mariotti,<sup>1</sup> Stefania Bramanti,<sup>1</sup> Francesco Ferrari,<sup>2,5</sup> Luca Castagna,<sup>1</sup> Domenico Mavilio<sup>1,3</sup> and Enrico Lugli<sup>1</sup>

<sup>1</sup>IRCCS Humanitas Research Hospital, Rozzano, Milan; <sup>2</sup>IFOM, the FIRC Institute of Molecular Oncology, Milan; <sup>3</sup>Department of Medical Biotechnologies and Translational Medicine (BioMeTra), University of Milan, Milan; <sup>4</sup>Department of Biomedical Sciences, Humanitas University, Pieve Emanuele, Milan and <sup>5</sup>IGM-CNR, Institute of Molecular Genetics "Luigi Luca Cavalli Sforza", National Research Council, Pavia, Italy

\*JJPvB and AJ contributed equally as co-first authors

Correspondence: ENRICO LUGLI - [enrico.lugli@humanitasresearch.it](mailto:enrico.lugli@humanitasresearch.it)

**Table S1.** Patient characteristics and treatment.

| ID  | D/R Sex | D/R Age | Pathology | Conditioning           | Graft type | GVHD prophylaxis <sup>f</sup> | aGVDH grade | Steroid therapy | CMV D/R | CMV viremia | CMV viremia onset | Antiviral treatment          | Blood samples analyzed                            |
|-----|---------|---------|-----------|------------------------|------------|-------------------------------|-------------|-----------------|---------|-------------|-------------------|------------------------------|---------------------------------------------------|
| #4  | M/F     | 52/22   | HL        | Baltimore <sup>a</sup> | BM         | FK                            | 2           | Yes             | -/+     | subclinical | day 57            | Ganciclovir                  | day 56, 99, 126, 180, 386                         |
| #5  | F/M     | 64/53   | NHL       | Baltimore <sup>a</sup> | BM         | FK                            | No          | No              | +/+     | subclinical | day 30            | No                           | day 44, 57, 63                                    |
| #8  | F/F     | 61/33   | HL        | Baltimore <sup>a</sup> | BM         | FK                            | No          | No              | +/+     | subclinical | day 49            | No                           | day 28, 74, 88, 112                               |
| #18 | M/M     | 51/25   | NHL       | Baltimore <sup>a</sup> | BM         | FK                            | 1           | No              | +/+     | No          | NA                | No                           | day 21, 29, 36, 43, 68, 75, 127, 369              |
| #19 | F/M     | 38/57   | HL        | Baltimore <sup>a</sup> | BM         | FK                            | 1           | No              | +/+     | subclinical | day 33            | No                           | day 29, 36, 43, 50, 68, 92, 113                   |
| #25 | M/M     | 35/62   | NHL       | Baltimore <sup>a</sup> | BM         | FK                            | 2           | No              | +/-     | clinical    | day 55            | Ganciclovir                  | graft and day 28, 42, 49, 58, 97, 121, 216, 349   |
| #26 | F/F     | 49/42   | NHL       | Baltimore <sup>a</sup> | BM         | FK                            | 1           | No              | +/+     | subclinical | day 48            | No                           | day 44, 51, 69, 76, 153, 202, 331                 |
| #34 | F/M     | 63/33   | AML       | TBF MAC <sup>b</sup>   | BM         | FK                            | No          | No              | +/+     | clinical    | day 40            | Ganciclovir                  | day 21, 29, 40, 96, 124, 190, 363                 |
| #38 | F/M     | 27/35   | ALL       | TBF MAC <sup>b</sup>   | BM         | CsA                           | No          | No              | +/+     | clinical    | day 32            | Ganciclovir                  | graft and day 28, 42, 74, 102, 144                |
| #47 | M/F     | 45/47   | NHL       | Baltimore <sup>a</sup> | BM         | CsA                           | 2           | Yes             | +/+     | clinical    | day 50            | Ganciclovir                  | graft and day 28, 76                              |
| #52 | M/M     | 53/38   | HL        | RIC <sup>c</sup>       | BM         | CsA                           | 2           | Yes             | +/-     | clinical    | day 32            | Valganciclovir               | graft and day 22, 28, 67, 112, 182, 330           |
| #56 | F/F     | 29/28   | HL        | GITMO <sup>d</sup>     | BM         | CsA                           | No          | No              | +/+     | clinical    | day 14            | Valganciclovir               | graft and day 49, 83                              |
| #59 | M/M     | 32/70   | MDS       | TBF RIC <sup>e</sup>   | PBSC       | CsA                           | No          | No              | +/+     | clinical    | day 32            | Ganciclovir - Valganciclovir | graft and day 21, 36                              |
| #60 | M/M     | 47/20   | HL        | Baltimore <sup>a</sup> | PBSC       | CsA                           | 2           | Yes             | -/+     | clinical    | day 39            | Ganciclovir - Foscarnet      | graft and day 21, 26, 64, 82, 141, 169, 348       |
| #63 | M/M     | 28/25   | HL        | Baltimore <sup>a</sup> | PBSC       | CsA                           | No          | No              | +/-     | clinical    | day 41            | Ganciclovir - Valganciclovir | graft and day 21, 27, 62, 100, 136, 161, 204, 282 |
| #65 | M/M     | 37/69   | MDS       | TBF RIC <sup>e</sup>   | BM         | CsA                           | 1           | No              | -/+     | clinical    | day 31            | Ganciclovir - Valganciclovir | day 21, 42, 59, 101, 126, 191, 302                |
| #66 | F/M     | 30/68   | AML       | TBF RIC <sup>e</sup>   | PBSC       | CsA                           | 4           | Yes             | +/+     | clinical    | day 27            | Ganciclovir                  | graft and day 38, 139                             |
| #70 | F/M     | 40/36   | ALL       | TBF MAC <sup>b</sup>   | PBSC       | CsA                           | 1           | No              | +/-     | clinical    | day 48            | Valganciclovir               | graft and day 48, 76, 104, 142, 167, 371          |
| #76 | M/F     | 33/56   | HL        | RIC <sup>c</sup>       | BM         | CsA                           | 1           | No              | +/+     | clinical    | day 27            | No                           | graft and day 90, 111, 223                        |
| #77 | M/F     | 61/26   | HL        | Baltimore <sup>a</sup> | BM         | CsA                           | 1           | No              | +/-     | No          | NA                | No                           | graft and day 27, 79, 121, 177, 205, 359          |
| #84 | M/M     | 25/52   | MF        | Baltimore <sup>a</sup> | PBSC       | CsA                           | No          | No              | -/+     | subclinical | day 95            | No                           | graft and day 48, 62, 100, 146, 184, 219          |

<sup>a</sup>See Luznik et al.<sup>1</sup><sup>b</sup>TBF MAC: thiotepa 10 mg/kg, busulfan 3.6 mg/kg, fludarabine 150 mg/m<sup>2</sup><sup>c</sup>RIC: thiotepa 10 mg/kg, cyclophosphamide 30 mg/kg, fludarabine 60 mg/m<sup>2</sup><sup>d</sup>GITMO: thiotepa 10 mg/kg, cyclophosphamide 60 mg/kg, fludarabine 60 mg/m<sup>2</sup><sup>e</sup>TBF RIC: thiotepa 5 mg/kg, busulfan 6.4 mg/kg, fludarabine 150 mg/m<sup>2</sup><sup>f</sup>All patients received pt-cy and mycophenolate mofetil

ALL, acute lymphoid leukemia; AML, acute myeloid leukemia; BM, bone-marrow; CsA, cyclosporine A; D, donor; F, female; FK, tacrolimus; HL, Hodgkin lymphoma; M, male; MAC, myeloablative conditioning; MDS, myeloid dysplastic syndrome; MF, myelofibrosis; NA, not applicable; NHL, non-Hodgkin lymphoma; PBSC, peripheral blood stem cells; R, recipient; RIC, reduced intensity conditioning; TBF, thiotepa-busulfan-fludarabine

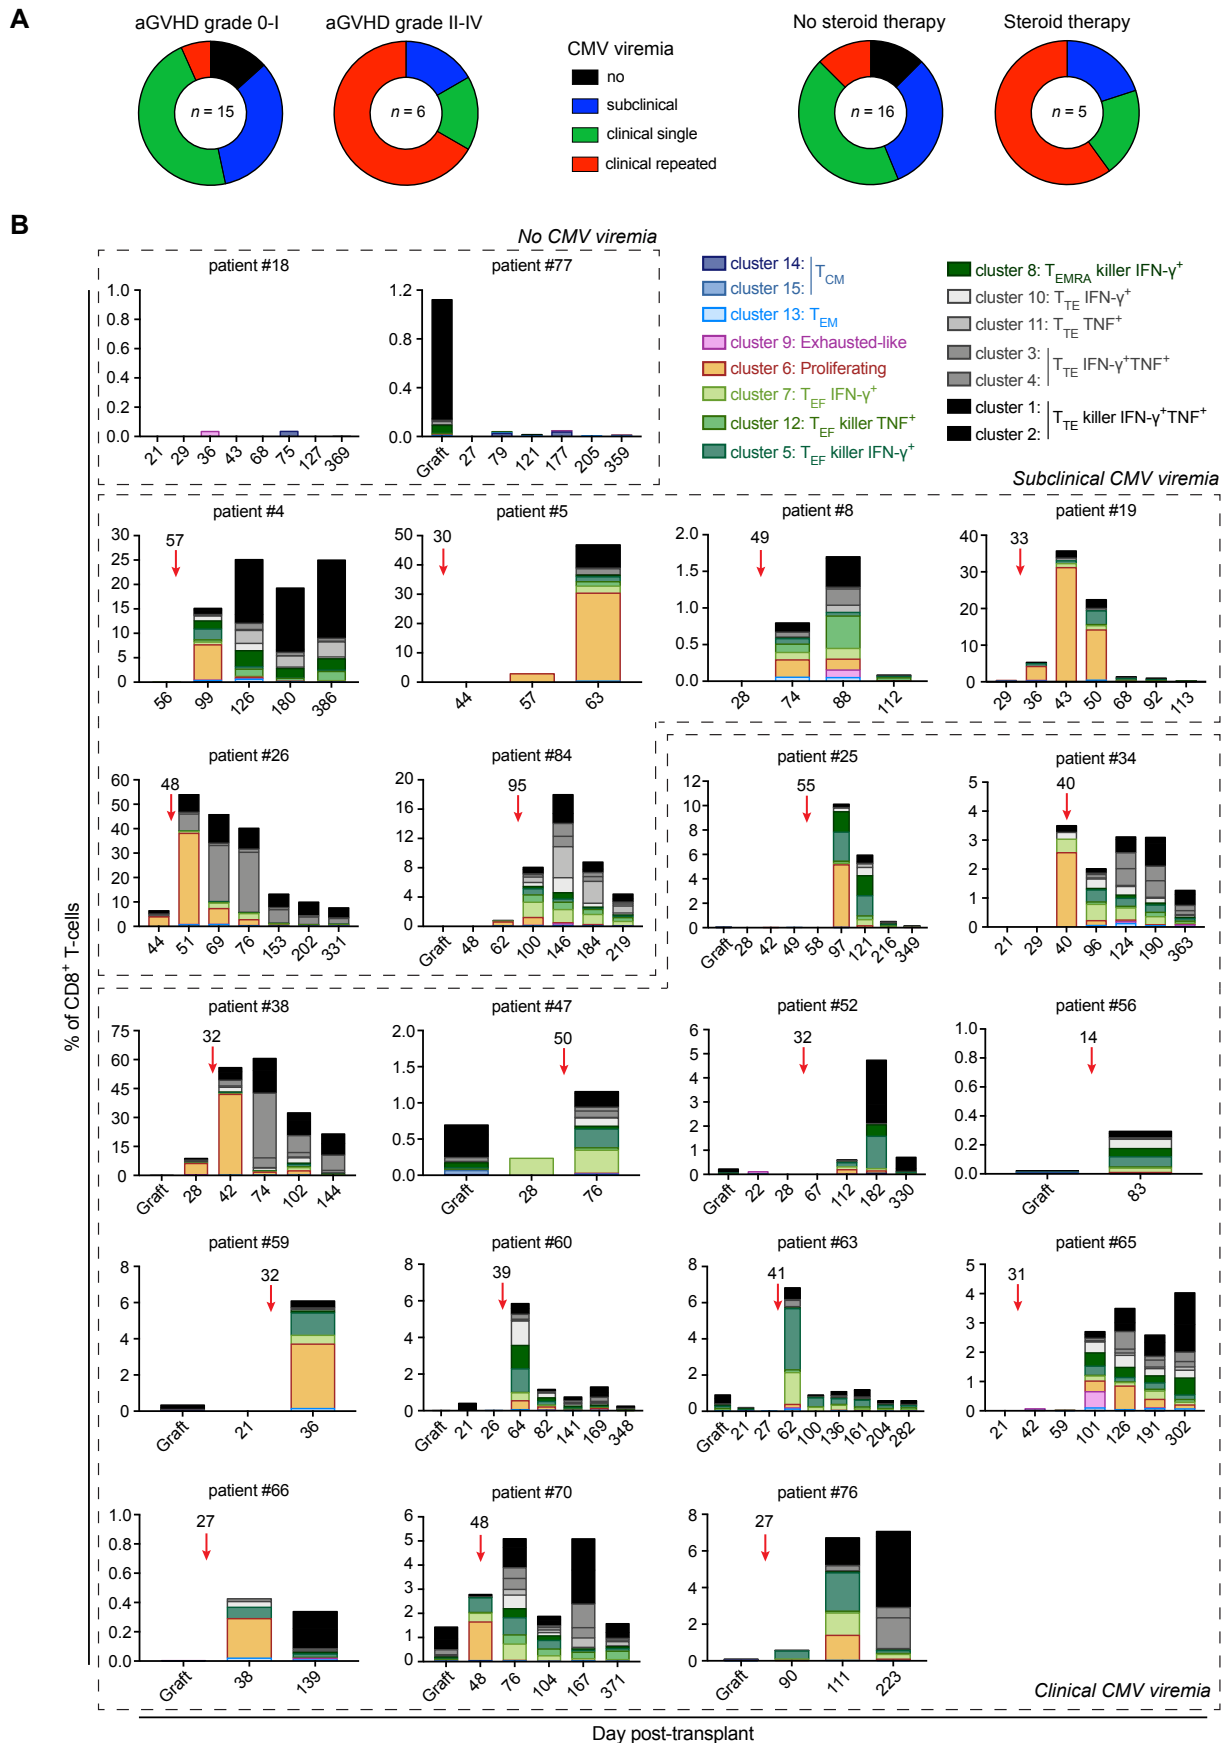

**Figure S1. Impact of aGVHD and corticosteroid therapy on CMV reactivation, and longitudinal high-dimensional profiling of CMV-specific CD8<sup>+</sup> T-cells in recipients of haplo-HSCT with pt-cy.** **A)** CMV reactivation among recipients of haplo-HSCT with pt-cy, stratified by occurrence of aGVHD or corticosteroid therapy. **B)** Frequencies of CMV-specific CD8<sup>+</sup> T-cell PhenoGraph clusters among total CD8<sup>+</sup> T-cells are shown for all measured time points. Arrows indicate the day post-transplant of CMV viremia onset. Patients are grouped according to post-transplant CMV viral load.

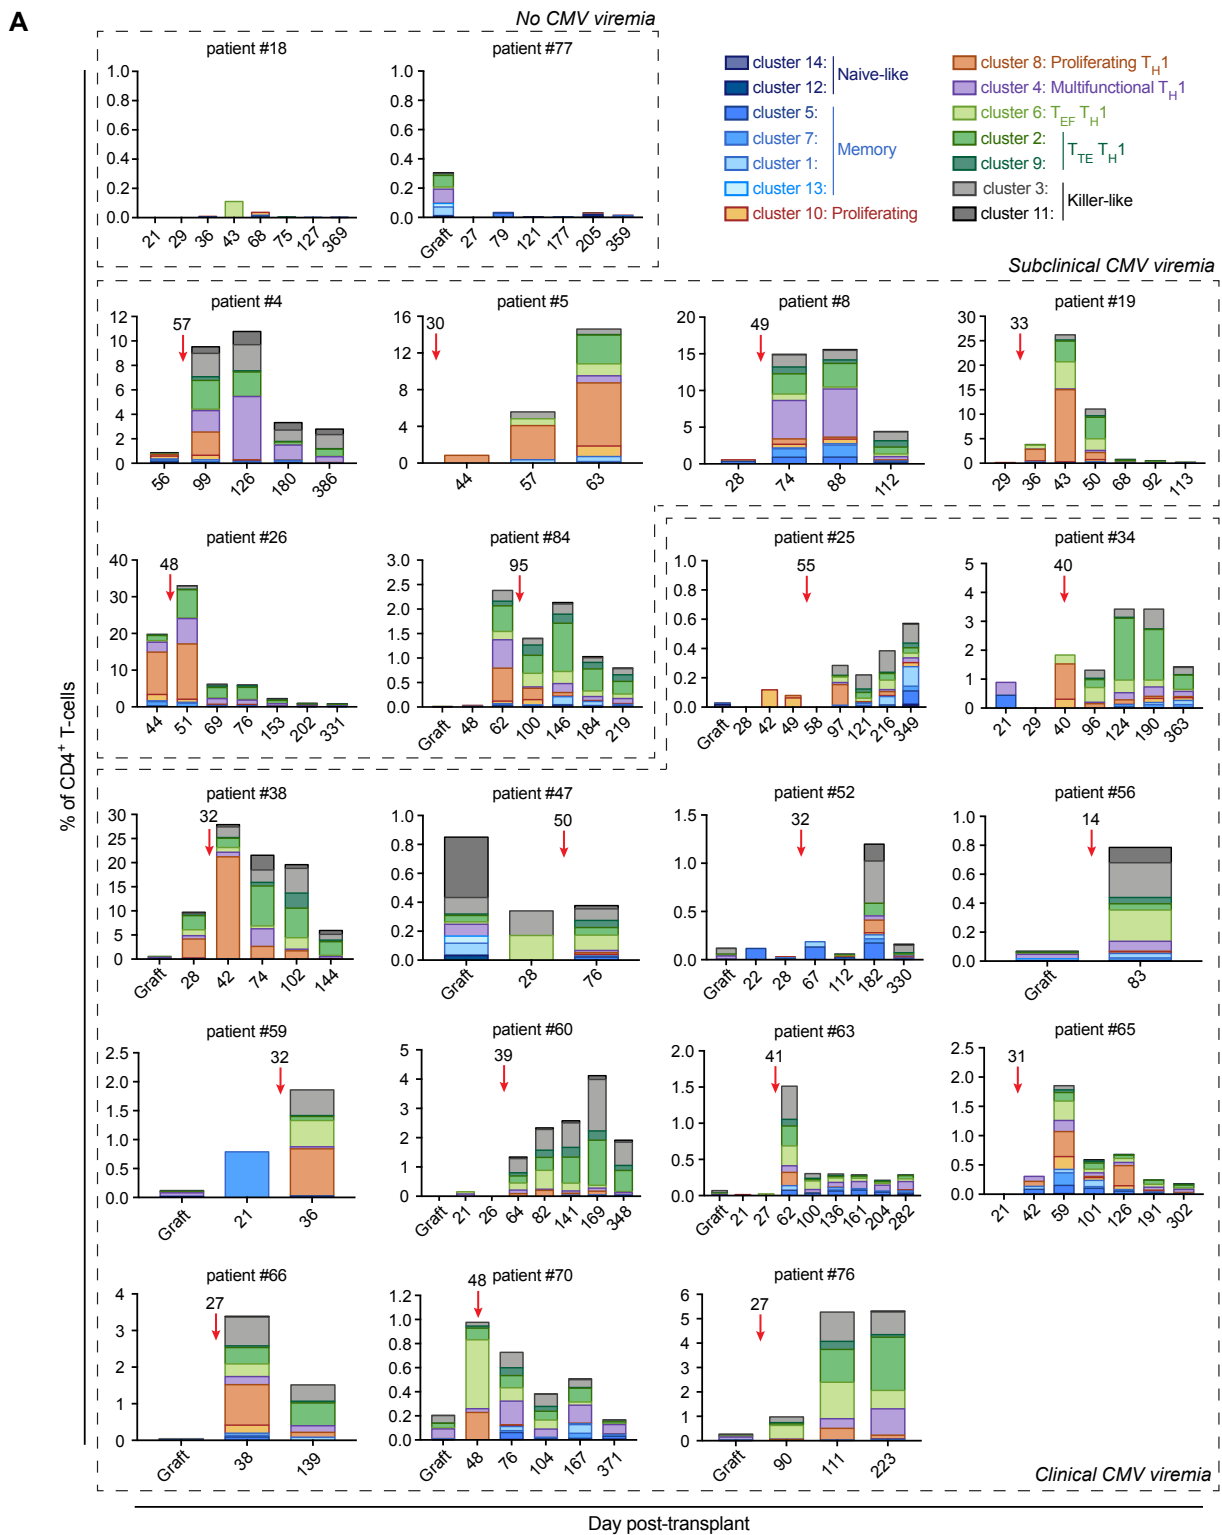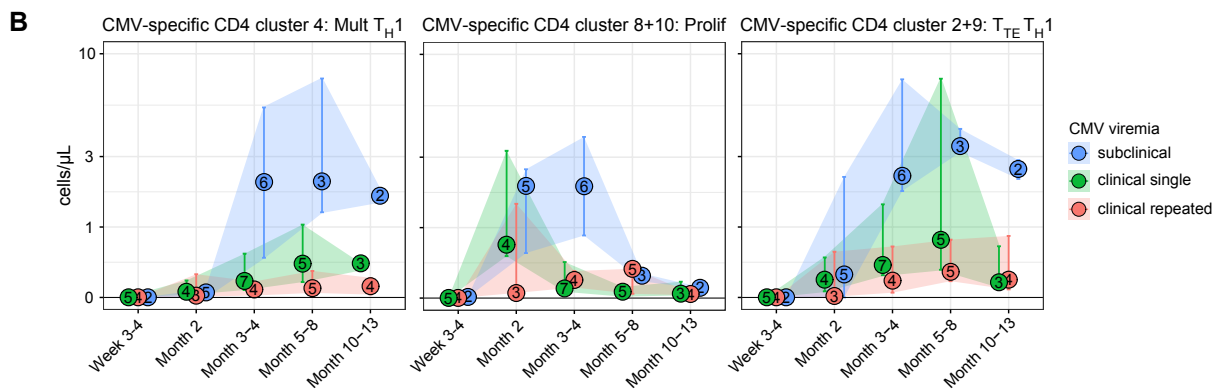

**Figure S2. CMV viremia control following haplo-HSCT with pt-cy associates with the development of distinct CD4<sup>+</sup> antigen-specific T-cell immunophenotypes. A)** Frequencies of CMV-specific CD4<sup>+</sup> T-cell PhenoGraph clusters among total CD4<sup>+</sup> T-cells are shown for all measured time points. Arrows indicate the day post-transplant of CMV viremia onset. Patients are grouped according to post-transplant CMV viral load. **B)** CMV-specific CD4<sup>+</sup> T-cell counts in the blood of haplo-HSCT patients experiencing CMV viremia during the first year post-transplant. Medians with the number of patients per time point are shown and error bars represent interquartile range.
